# Supplementary material for: A vasculature niche orchestrates stromal cell phenotype through PDGF signaling: Importance in human fibrotic disease
Source: PubMed Central journal article supplement (PMC9060460; doi:10.1073/pnas.2120336119), 2022-03-23
Supplement: pnas.2120336119.sapp.pdf [file pnas.2120336119.sapp.pdf]

# **A vasculature niche orchestrates stromal cell phenotype through PDGF signaling: importance in human fibrotic disease**

## **Authors**

Thomas B Layton<sup>1</sup>, Lynn Williams<sup>1</sup>, Nan Yang<sup>1</sup>, Mingjun Zhang<sup>2</sup>, Carl Lee<sup>1</sup>, Marc Feldmann<sup>1</sup>, Glenda Trujillo<sup>3</sup>, Dominic Furniss<sup>4</sup>, Jagdeep Nanchahal<sup>1†</sup>

## **Affiliations**

<sup>1</sup>The Kennedy Institute of Rheumatology, Nuffield Department of Orthopaedics, Rheumatology and Musculoskeletal Sciences, University of Oxford, UK

<sup>2</sup>Biotherapeutics, Bristol-Myers Squibb, San Diego, California, United States of America.

<sup>3</sup>Fibrosis Biology Drug Discovery, Bristol-Myers Squibb, Lawrenceville, New Jersey, United States of America.

<sup>4</sup>Nuffield Department of Orthopaedics, Rheumatology, and Musculoskeletal Sciences, University of Oxford, Botnar Research Centre, UK.

†Corresponding author. Email: [jagdeep.nanchahal@kennedy.ox.ac.uk](mailto:jagdeep.nanchahal@kennedy.ox.ac.uk)

**One Sentence Summary:** In human fibrosis a discrete vascular niche housing a myofibroblast precursor is critical in maintaining the proinflammatory microenvironment by supporting immune regulatory fibroblast identity through PDGF signalling.

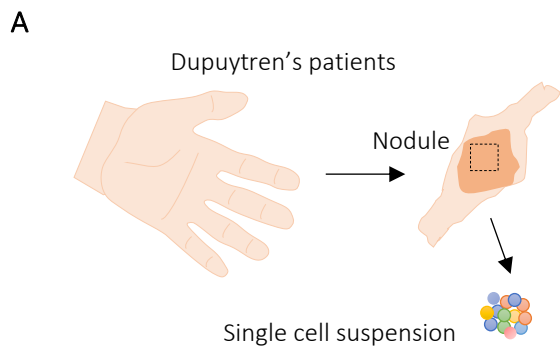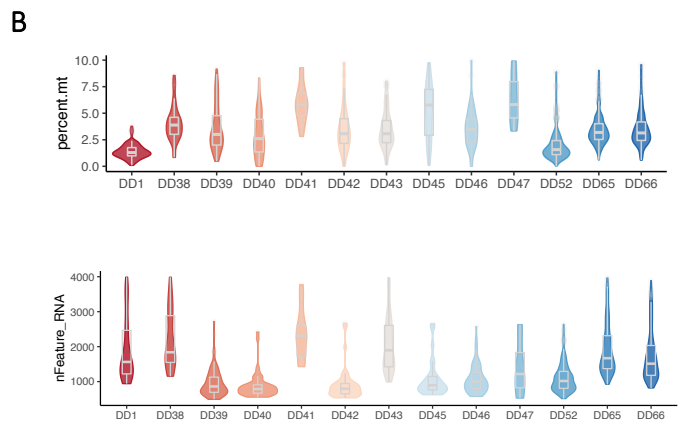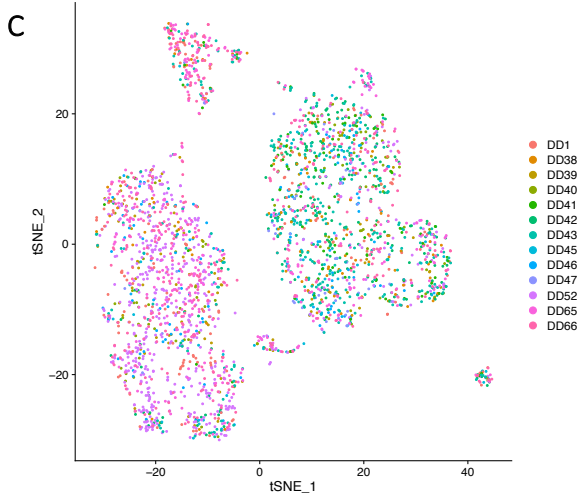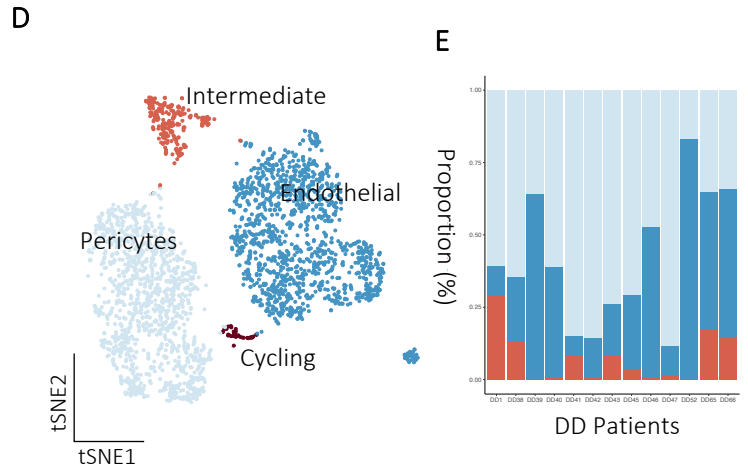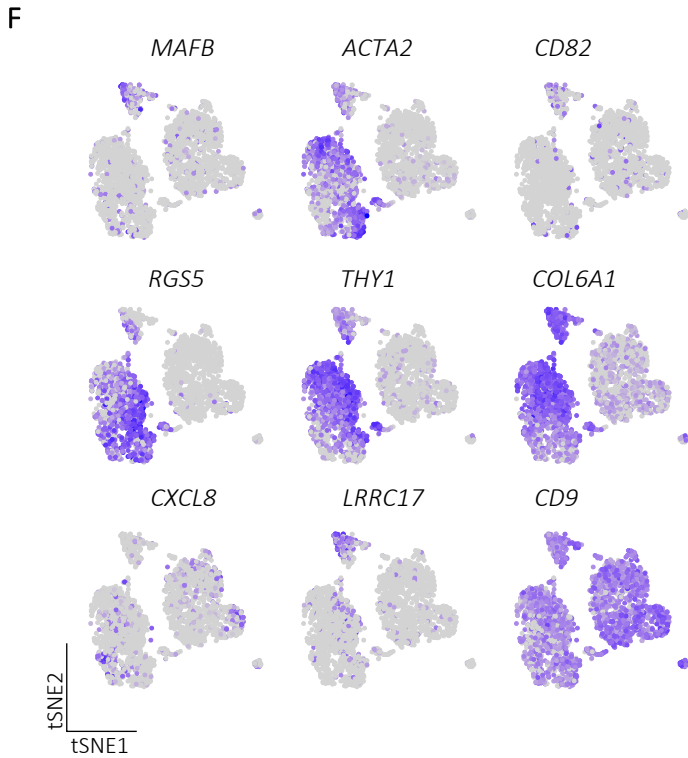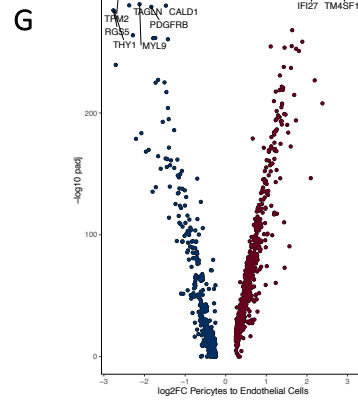

**I**

| Patient ID | Age | Gender |
|------------|-----|--------|
| DD1        | 67  | Male   |
| DD38       | 58  | Male   |
| DD40       | 69  | Female |
| DD41       | 54  | Male   |
| DD42       | 60  | Female |
| DD43       | 77  | Male   |
| DD45       | 56  | Male   |
| DD46       | 79  | Female |
| DD47       | 78  | Male   |
| DD52       | 69  | Male   |
| DD65       | 67  | Female |
| DD66       | 79  | Male   |

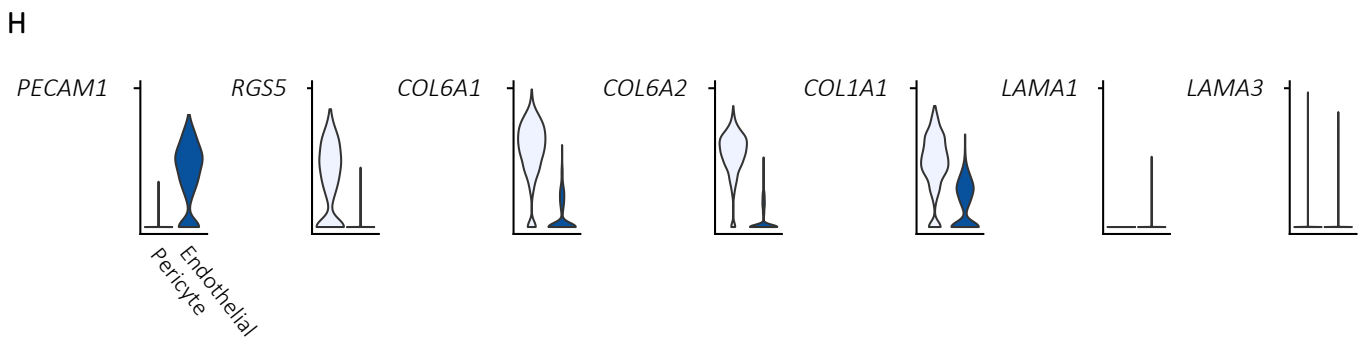

**Fig. S1. Single cell RNA-seq of Dupuytren's nodules.**

(A) Schematic illustrating experimental protocol for single cell profiling of Dupuytren's nodule. (B) Violin plots showing quality control metrics in DD patients (in single cell RNA-seq. Y axis in  $\log(\text{UMI}+1)$  for nUMI and percentage of cells for mitochondrial reads. DD is prefix for DD patient IDs ( $n = 12$  DD patients). (C) tSNE projections showing patient donors for 7,332 cells ( $n = 12$  DD patients) in single cell RNA-seq. (D) tSNE projection showing major cell types for 7,332 cells ( $n = 12$  DD patients) in single cell RNA-seq. (E) Stacked bar plot showing the proportion of pericytes, intermediate pericytes and endothelial cells in each Dupuytren's nodule ( $n = 12$  DD patients, DD is prefix for patient ID. (F) tSNE projections showing expression in  $\log(\text{UMI}+1)$  of selected genes for major cell types for 7,332 cells ( $n = 12$  DD patients) in single cell RNA-seq. (G) Volcano plot showing differentially expressed genes (2-sided Wilcoxon Rank Sum Test) between pericytes and endothelial cells in single cell RNA-seq with FDR corrected adjusted  $p$ -values (BH correction). (H) Violin plots showing normalized mRNA expression of matrix proteins in endothelial cells and pericytes. (I) Table showing patient ID and details for 12 patients in scRNA-seq data.

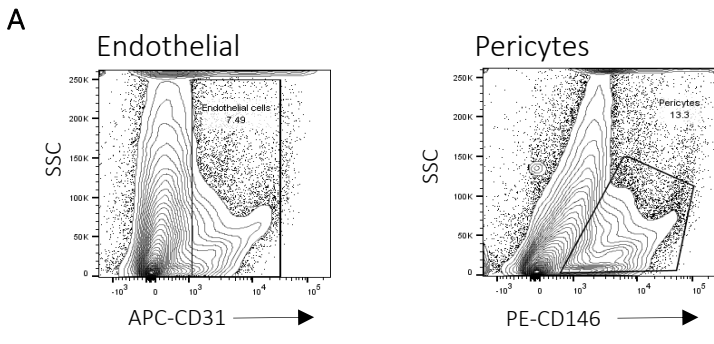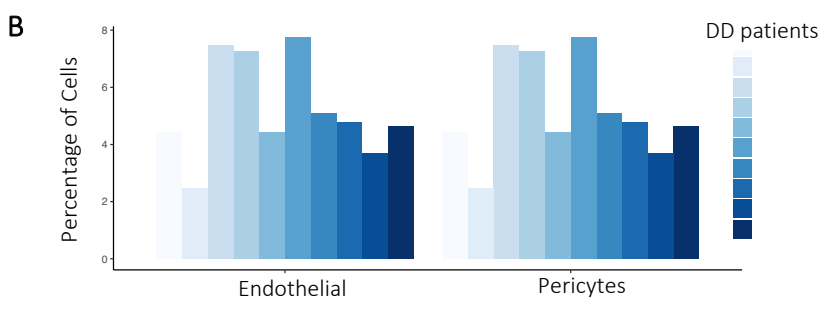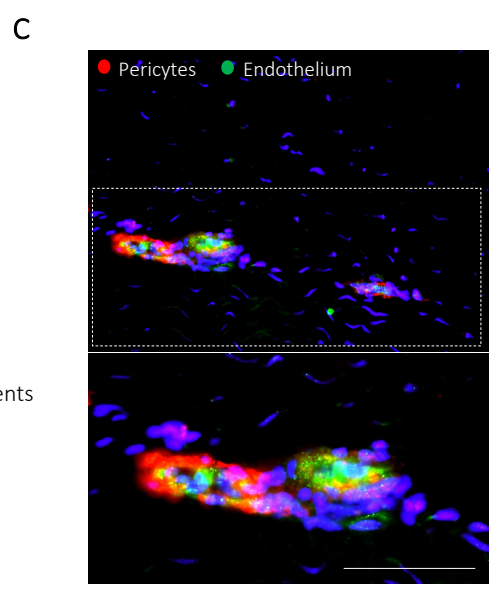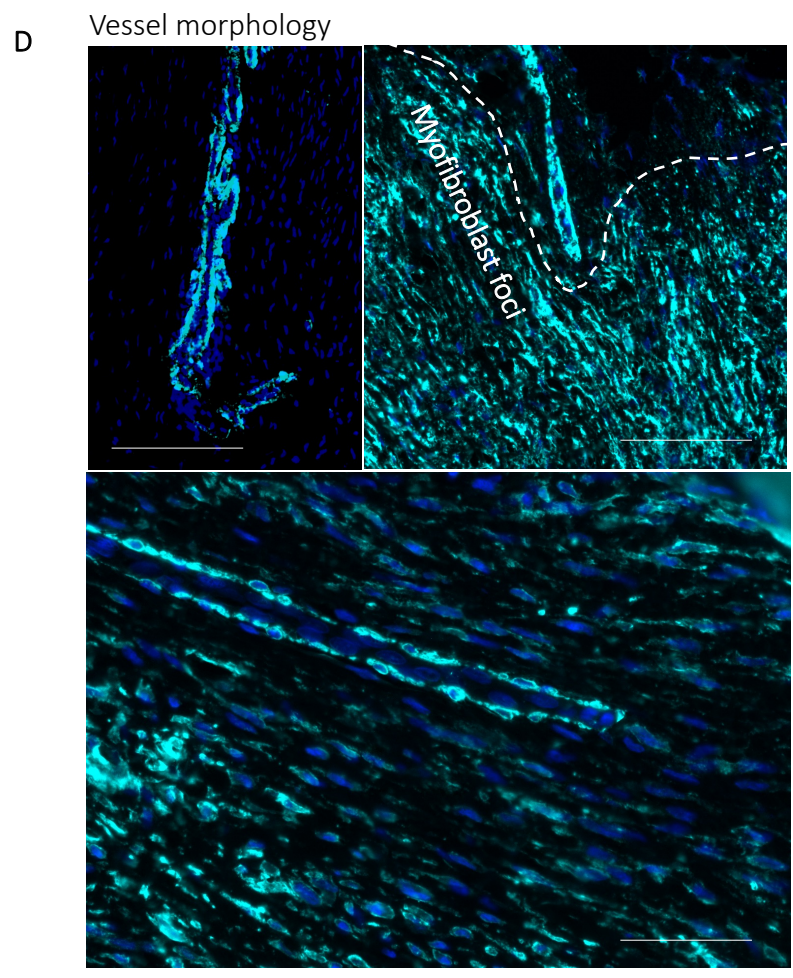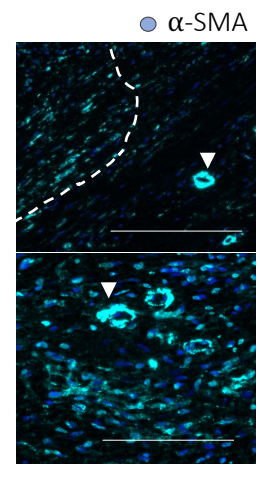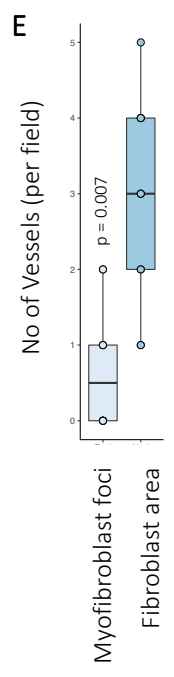

## Fig. S2. Validation of a vascular compartment in DD

(A) Representative density plots of flow cytometry analysis showing endothelial cells (CD31<sup>+</sup>) and pericytes (CD146<sup>+</sup>) in freshly isolated DD nodular cells (CD45<sup>-</sup>) ( $n = 6$  DD patients). (B) Bar plots of flow cytometry analysis in freshly isolated DD nodular cells (CD45<sup>-</sup>) showing the proportion of total cells isolated as pericytes and endothelial cells. (C) Confocal images of immunofluorescence showing expression of CD31 (endothelium) and  $\alpha$ -SMA (pericytes) in DD nodules. Scale bar is 10  $\mu\text{m}$ . ( $n = 6$  DD patients). (D) Confocal images of immunofluorescence showing morphology and distribution of  $\alpha$ -SMA<sup>+</sup> pericytes in DD nodules. Scale bar is 10  $\mu\text{m}$ . ( $n = 6$  DD patients). (E) Box and whisker plot showing quantification of vessel density in myofibroblast foci and fibroblast areas in DD nodules. 2-sided unpaired  $t$ -test. Scale bar 50  $\mu\text{m}$  ( $n = 6$  DD patients, 3 independent experiments).

A

●  $\alpha$ -SMA  
● PDGFR- $\alpha$

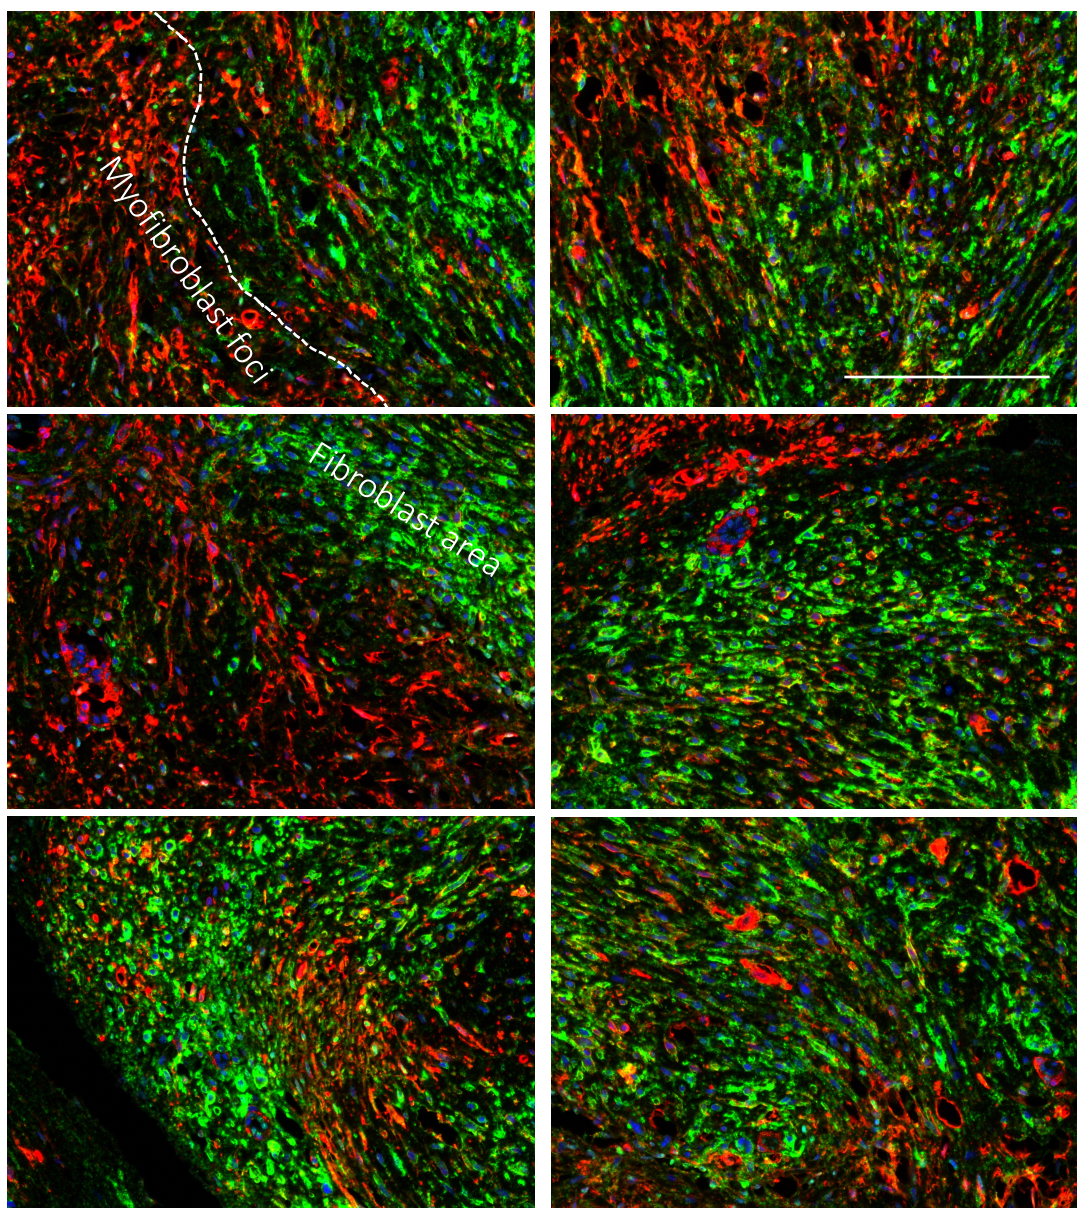

**Fig. S3. Discrete stromal cell microenvironments in Dupuytren's nodules.**

(A) Confocal images of immunofluorescence in six independent patients showing expression of  $\alpha$ -SMA and PDGFR- $\alpha$  in DD nodules. Scale bar is 50  $\mu$ m.

A

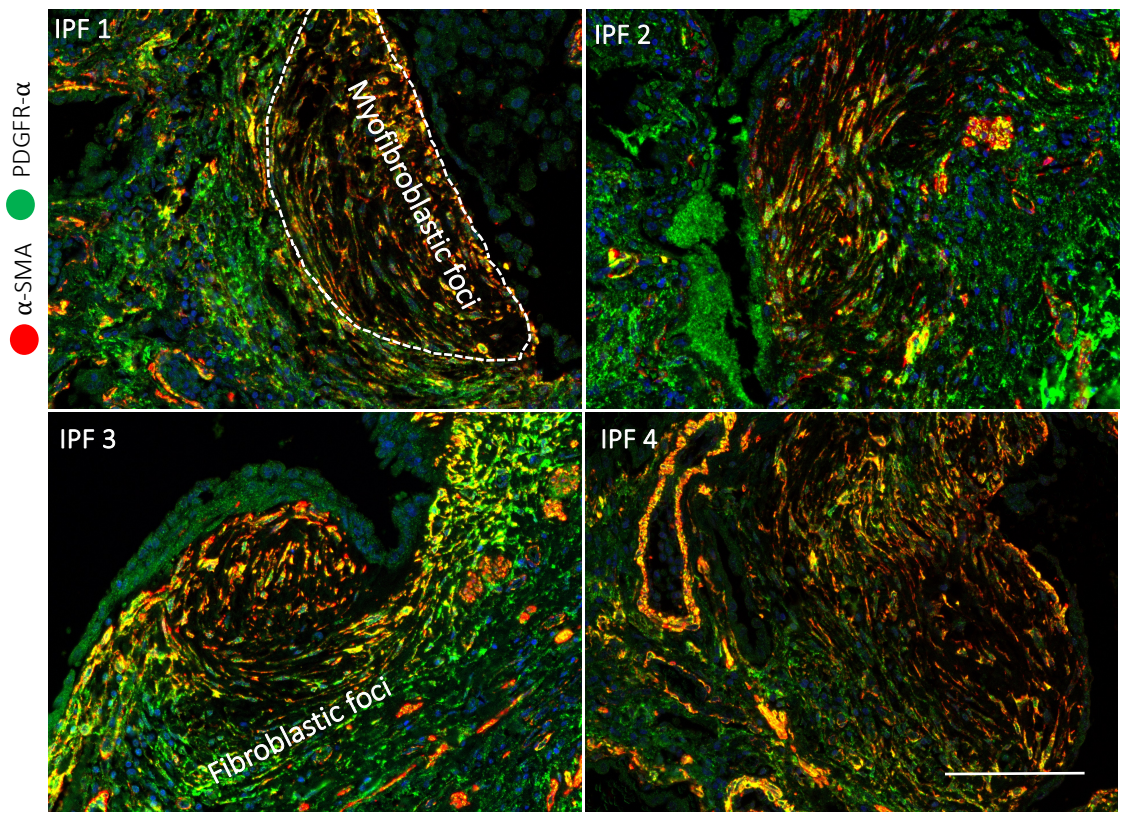



**Fig S4. Discrete stromal cell microenvironments in IPF**

(A) Confocal images of immunofluorescence in four independent patients showing expression of  $\alpha$ -SMA and PDGFR- $\alpha$  in human IPF. Scale bar is 70  $\mu$ m.

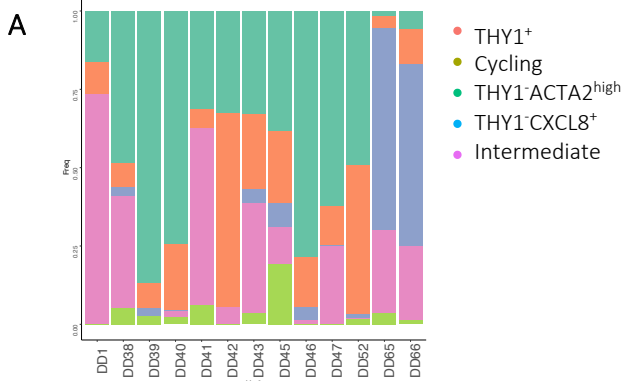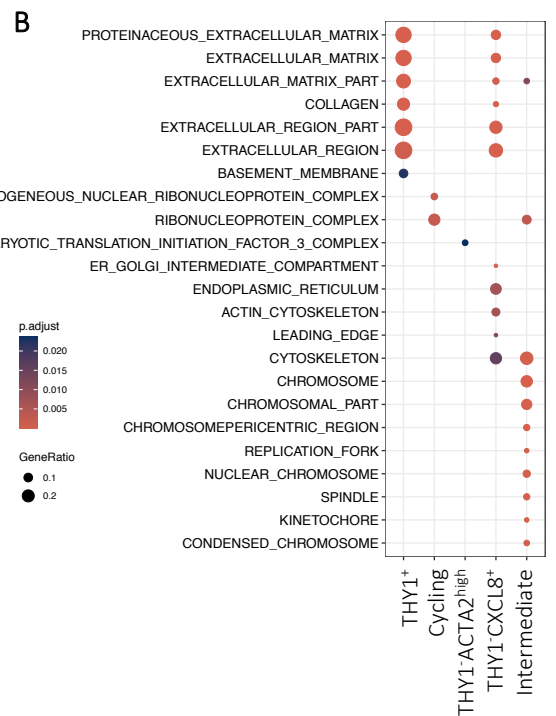

DD pericytes

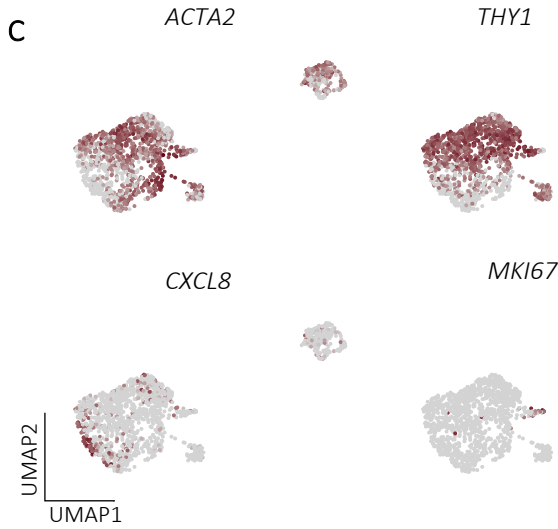

**D**

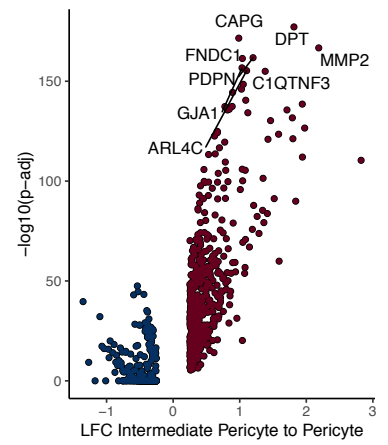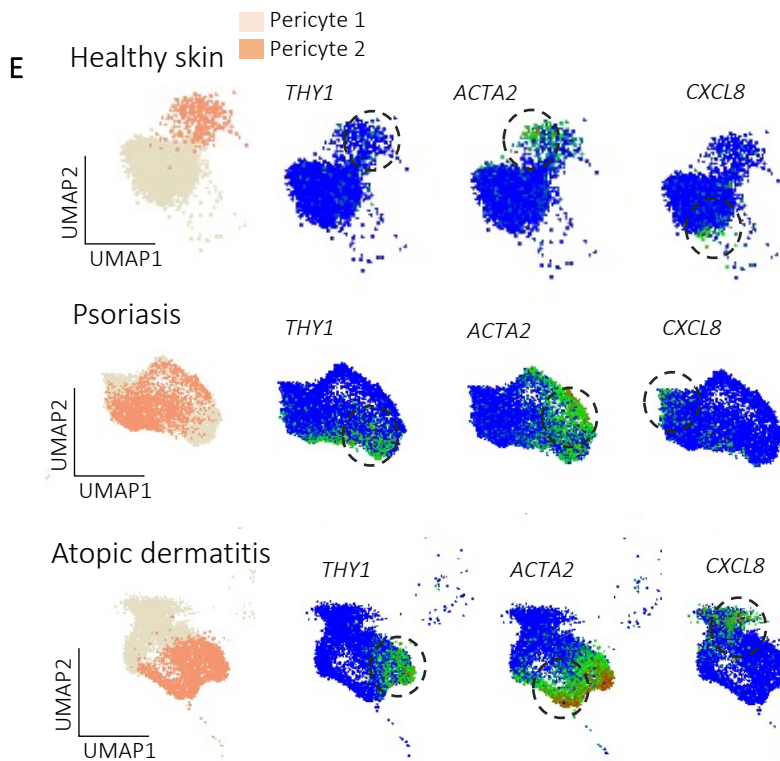

**F** Cirrhosis pericytes

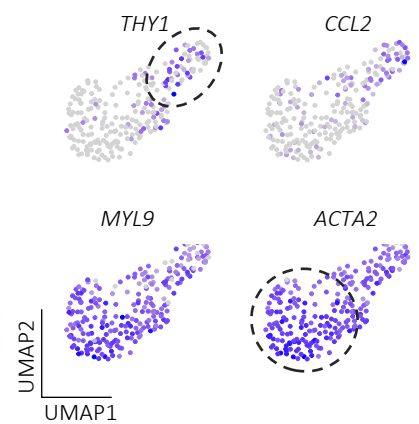

**G** Skin pericytes

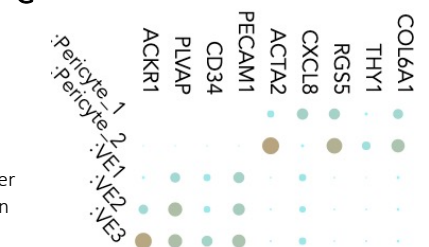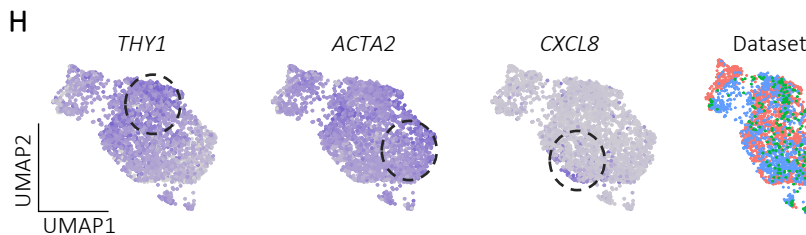

### **Fig. S5. Five subsets of pro-fibrotic pericytes housing an intermediate population**

(A) Bar plot of single cell RNA-seq showing the proportions of pericyte subsets in DD patients as a total of all pericytes. ( $n = 12$  DD patients). (B) Dot plot showing pathways enriched in pericytes in single cell RNA-seq. Gene ratio is the number of genes found in pathways and  $p_{\text{adjust}}$  is adjusted  $p$ -value (2-sided Wilcoxon Rank Sum test, BH FDR-correction). (C) UMAP projections of single cell RNA-seq of DD pericytes coloured by z-score expression of marker genes of major subsets (*ACTA2*, *THY1*, *CXCL8* & *MKI67*). ( $n = 12$  DD patients). (D) Volcano plot showing differentially expressed genes (2-sided Wilcoxon Rank Sum Test) between pericytes and intermediate pericytes in single cell RNA-seq with FDR corrected adjusted  $p$ -values (BH correction). (E) UMAP projections of single cell RNA-seq of skin pericytes coloured clusters and by z-score expression of marker genes of major subsets (*ACTA2*, *THY1* & *CXCL8*). (F) UMAP projections of single cell RNA-seq of liver pericytes coloured by z-score expression of marker genes of major subsets (*ACTA2* & *THY1*). (G) Dot plot of skin pericytes scRNA-seq showing expression of general pericyte markers (*COL6A1* & *RSG5*) and those of specific subsets (*THY1*, *ACTA2* & *CXCL8*). (H) UMAP projections of cross tissue pericyte single cell RNA-seq atlas of skin, liver and hand pericytes coloured clusters and by z-score expression of marker genes of major subsets (*ACTA2*, *THY1* & *CXCL8*).

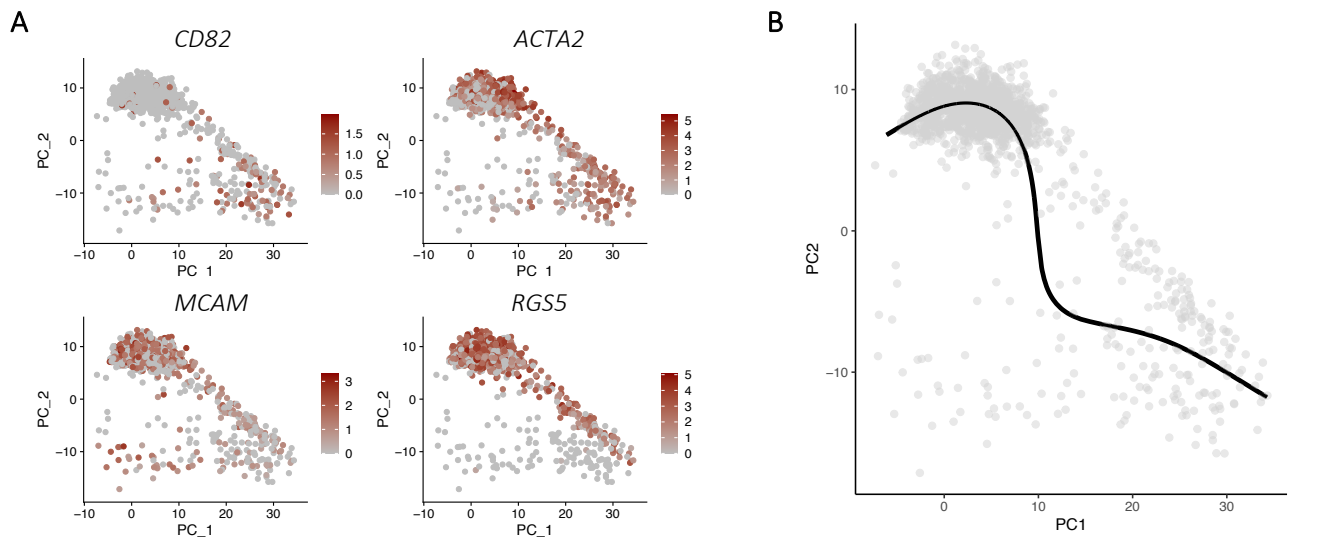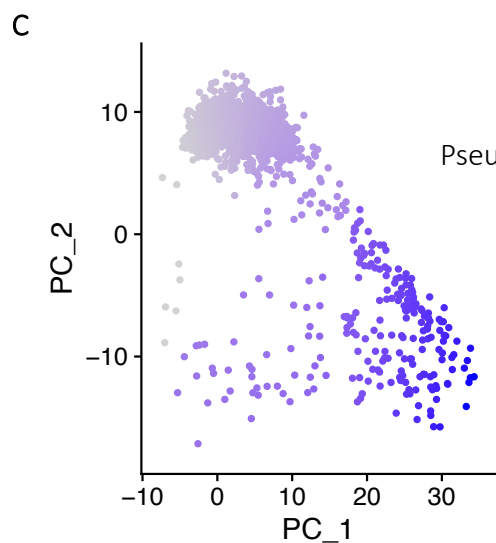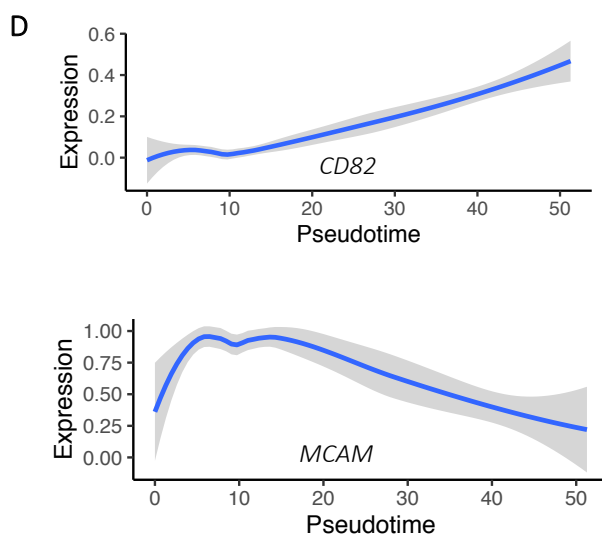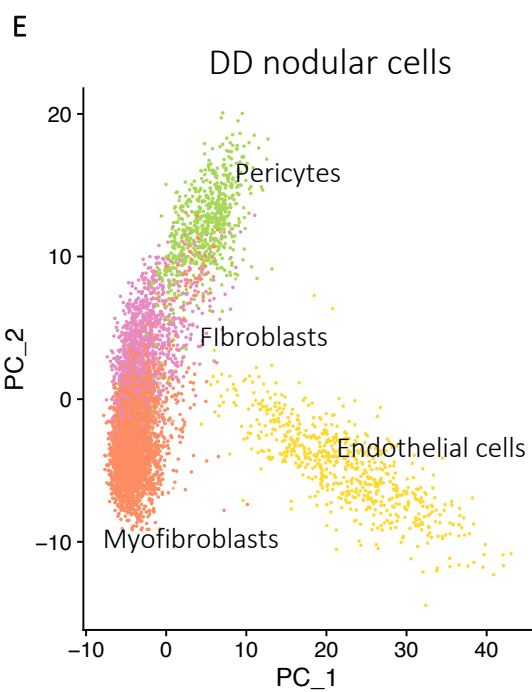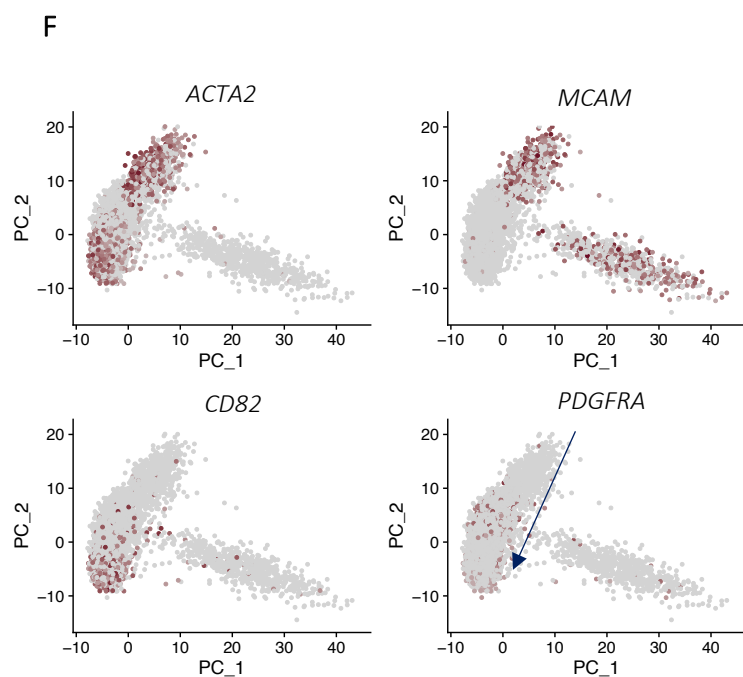

### Fig. S6. Pseudotemporal ordering of pro-fibrotic pericytes

(A) Principal component analysis (PCA) of pericyte single cell RNA-seq showing the expression of selected genes in  $\log(\text{UMI}+1)$  ( $n=12$  DD patients). PCA is a linear dimensional reduction method and the first two principal components capture a putative differentiation pathway towards the intermediate subset. (B) PCA embedding of pericyte single cell RNA-seq showing overlay of principle curve fit. Principle curve used to assign cells along pseudotime order. (C) PCA embedding of pericyte single cell RNA-seq coloured by pseudotime. Pseudotime is defined by the principal curve fit to PCA coordinates (smoother = 'lowess',  $f=1/3$ ). (D) Line plots showing the expression (*loess* smoothed normalized expression  $\pm$  SE) of selected genes along modelled pseudotime (slingshot pseudotime) in single cell RNA-seq of pericytes ( $n = 12$  DD patients). Pseudotime was defined by fitting a principal curve along the first two diffusion map coordinates. (E) PCA embedding of entire DD dataset single cell RNA-seq coloured by major cell types ( $n=6$ ,  $k= 7,234$  cells). (F) PCA embedding of entire DD dataset single cell RNA-seq coloured by the expression of lineage markers in  $\log(\text{UMI}+1)$  ( $n=12$  DD patients). *ACTA2* marks pericytes and myofibroblasts. *MCAM* marks endothelial cells and pericytes. *CD82* marks myofibroblasts and *PDGFRA* marks fibroblasts. Arrows represents the trajectory moving from pericytes to myofibroblasts. The PCA plot demonstrates a trajectory along PC2 that captures a pericyte to fibroblasts to myofibroblast transition marked by the arrow.

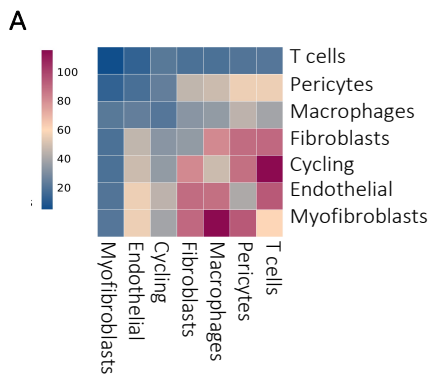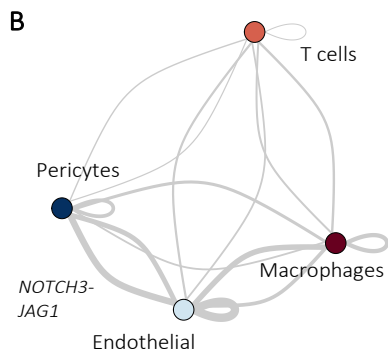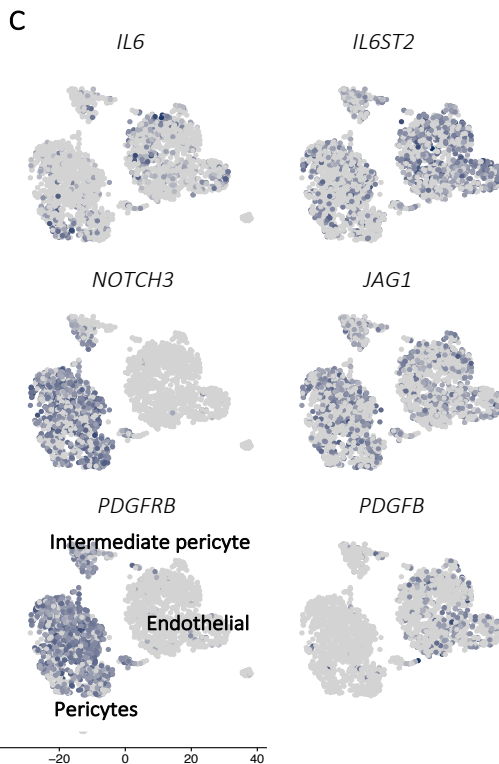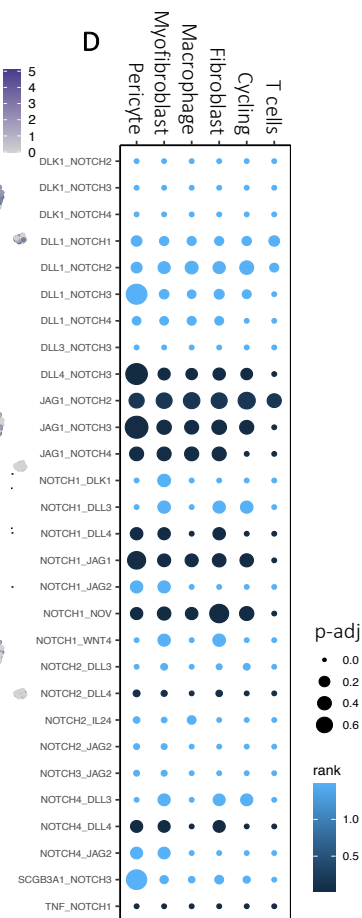

DD Nodule

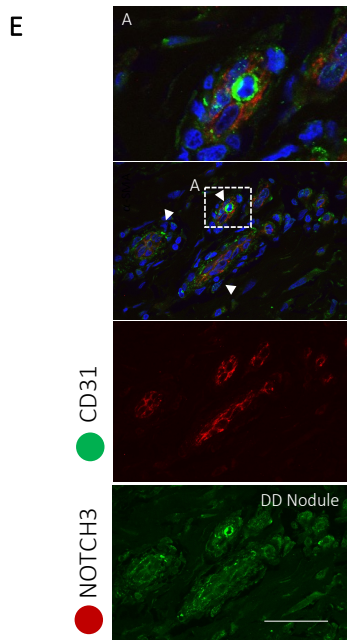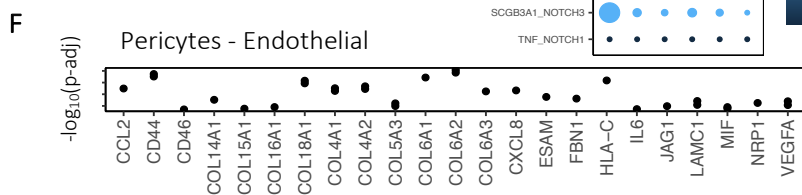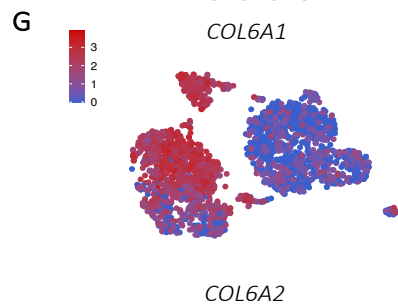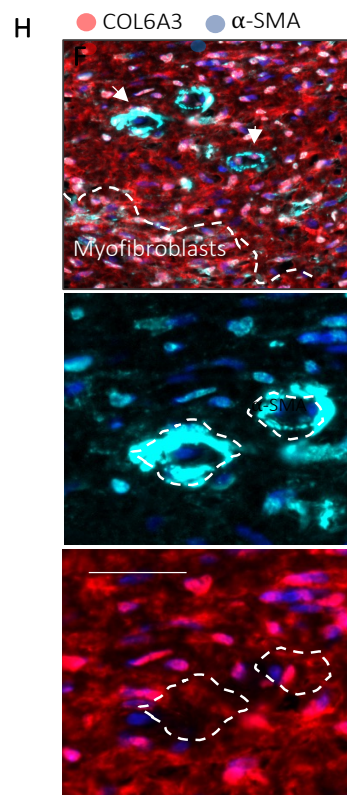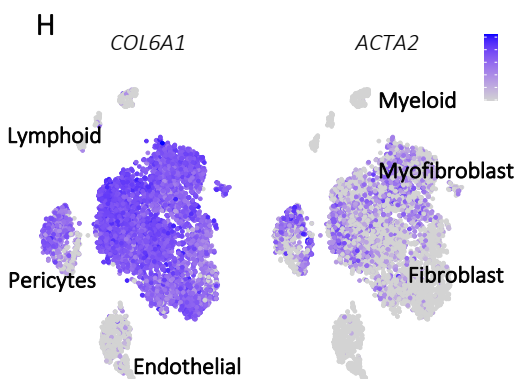

## Fig. S7. Coupling of the fibrotic vasculature

(A) Heatmap of cell-cell interaction analysis in single cell RNA-seq showing the number of significant ( $p\text{-adjust} < 0.05$ ) interactions between cell types in DD nodules ( $n = 12$  DD patients). (B) Network plot showing interactions between cell types. Line width is weighted by the number of significant interactions. (C) tSNE projections of single cell RNA-seq showing RNA expression ( $\log(\text{UMI}+1)$ ) in pericytes and endothelial cells of selected genes in significantly enriched pathways between cell types. (D) Dot plot showing RNA expression of receptor-ligand pairs in significantly enriched pathways following interaction analysis of single cell RNA-seq. Rank is the receptor-ligand pair rank in pathways and  $p\text{-adjust}$  is adjusted p-value (2-sided Wilcoxon Rank Sum test, BH FDR-correction). (E) Confocal images of immunofluorescence showing NOTCH3 expression in pericytes lining the endothelium (CD31) in DD nodules ( $n = 3$  DD patients). Scale bar 30  $\mu\text{m}$ . (F) Dot plot showing pericyte genes mediating the significant pericyte-endothelial cell interactions.  $p\text{-adjust}$  is adjusted p-value (2-sided Wilcoxon Rank Sum test, BH FDR-correction). (G) tSNE projections of single cell RNA-seq showing RNA expression ( $\log(\text{UMI}+1)$ ) in pericytes and endothelial cells of collagen 6 transcripts. (H) Confocal images of immunofluorescence showing COL6A3 and  $\alpha\text{-SMA}$  expression in pericytes in DD nodules ( $n = 3$  DD patients). Scale bar 10  $\mu\text{m}$ . (I) tSNE projections of single cell RNA-seq showing RNA expression ( $\log(\text{UMI}+1)$ ) in DD nodular cells of *ACTA2* and *COL6A1*.

A

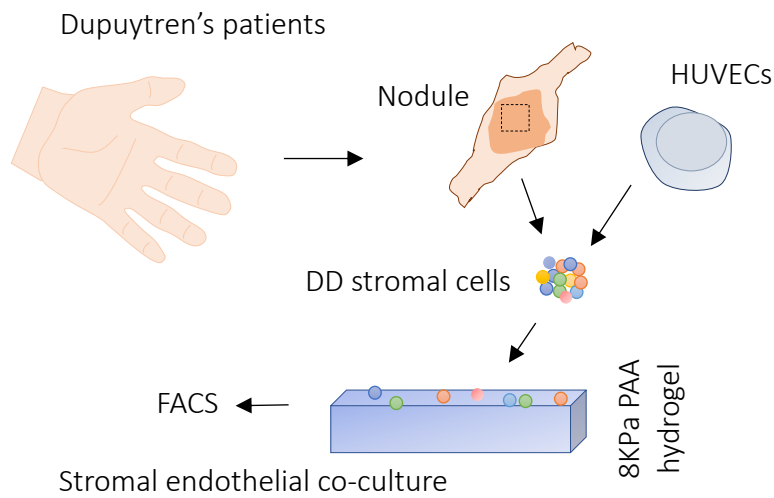

B

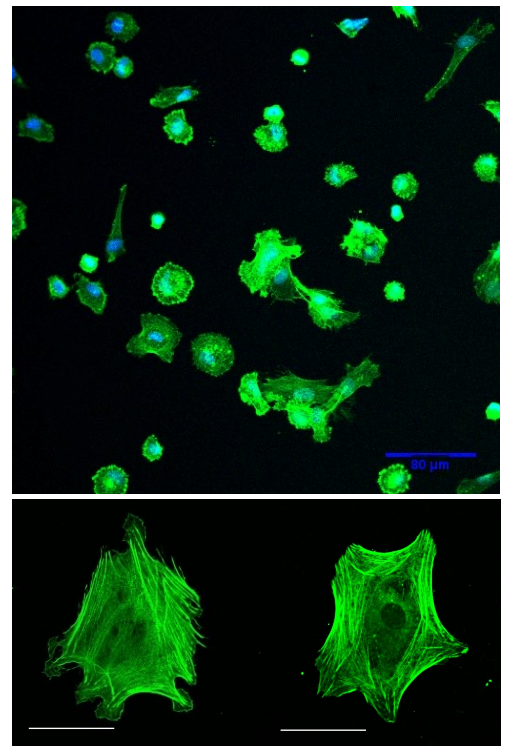

C

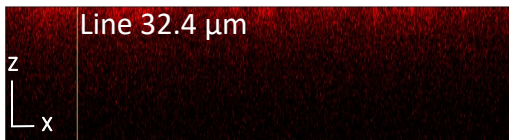

D

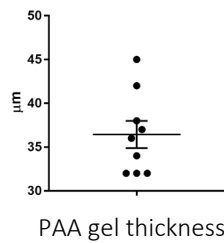

E

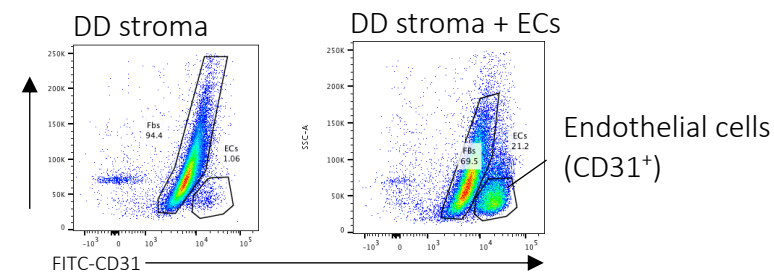

H

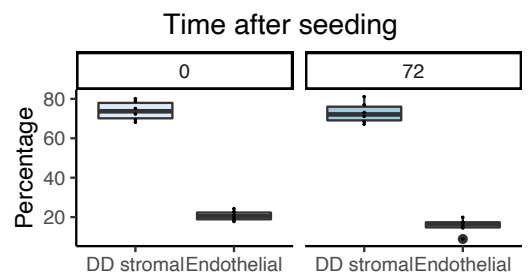

F

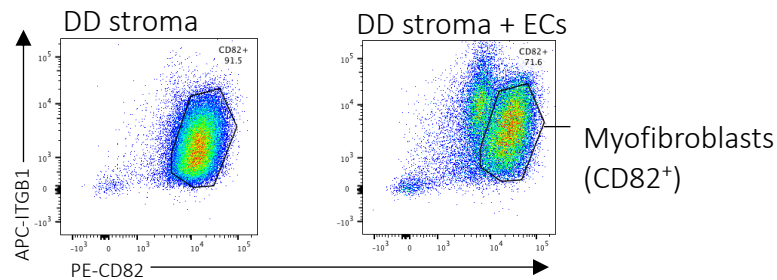

G

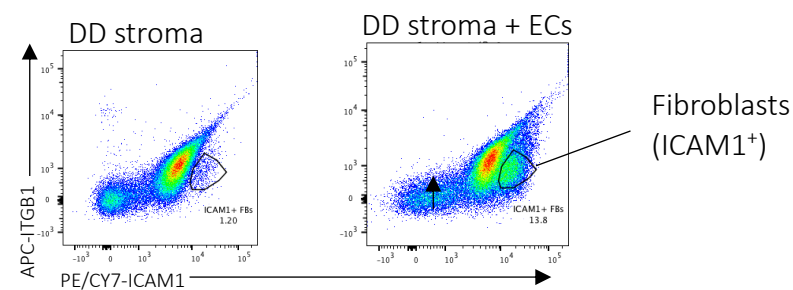

J

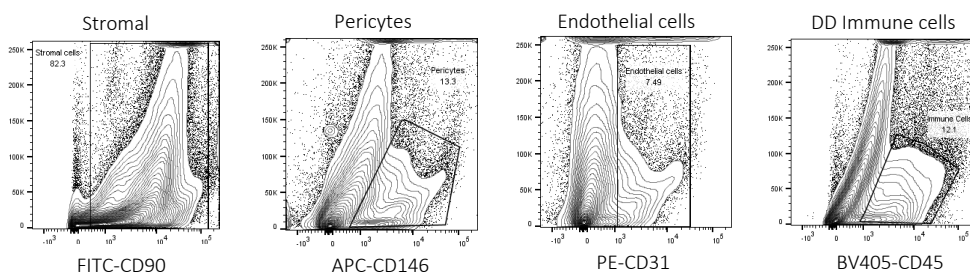

I

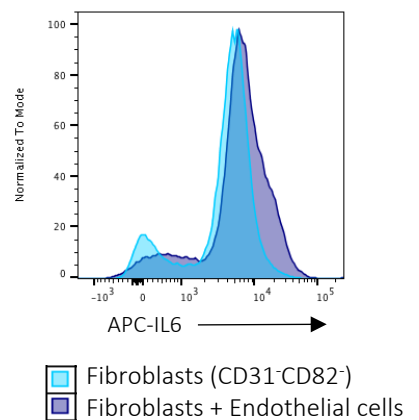

K

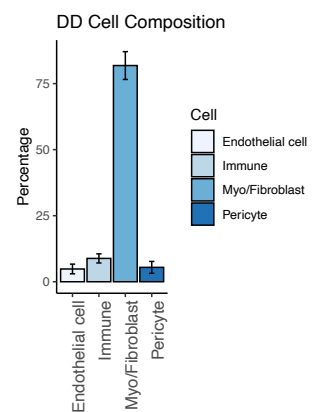



**Fig. S8. Co-culture system with DD stromal cells and endothelial cells.**

(A) Schematic illustrating experimental protocol for single cell profiling of Dupuytren's nodule. (B) Confocal image of Phalloidin-488 staining of DD stromal cells 72hrs after seeding on 8KPa polyacrylamide (PAA) hydrogel showing cell attachment, spreading and stress fibre formation. (C) Image of z-stack acquisition of PAA hydrogel with fiducial marker beads (FluoSpheres MicroSpheres 0.2  $\mu\text{m}$ ) showing thickness of PAA hydrogels (D) Scatter plot showing PAA gel thickness (mean = 36.2  $\mu\text{m}$ ,  $n = 9$  independent experiments). (E-G) Density plots of flow cytometry analysis for co-culture of freshly isolated (E) DD nodular cells and endothelial cells showing proportion of (F) myofibroblasts ( $\text{CD82}^+\text{ITG-}\beta 1^{\text{high}}$ ) and (G) fibroblasts ( $\text{ICAM1}^+\text{ITG-}\beta 1^{\text{high}}$ ) ( $n = 8$  DD patients). (H) Boxplot showing flow cytometry analysis of the percentage of endothelial cells and DD stromal cells ( $\text{CD45}^-$ ) before (0hrs) and after (72hrs) co-culture assay ( $n=8$  DD patients). (I) Histogram showing flow cytometry analysis of IL6 expression in fibroblasts ( $\text{ICAM1}^+\text{ITG-}\beta 1^{\text{low}}$ ) with and without endothelial cells ( $n = 6$  DD patients). (J) Density plots of flow cytometry analysis of isolated DD nodular cells showing proportion of stromal ( $\text{CD45}^-\text{THY1}^+$ ), pericytes ( $\text{CD45}^-\text{CD31}^-\text{CD146}^+$ ), endothelial cells ( $\text{CD45}^-\text{CD31}^+\text{CD146}^-$ ) and immune cells ( $\text{CD45}^+$ ). (K) Bar plot of flow cytometry analysis showing the proportion of cell types in freshly isolated DD nodular cells ( $n=8$  DD patients).
